# Supplementary material
Source: PubMed Central journal article supplement (PMC7044020)

**A. BALB/c bmEos**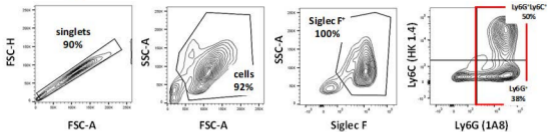**B. C57BL/6 bmEos**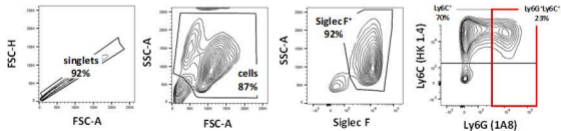

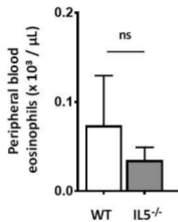

Suppl. Fig. 2

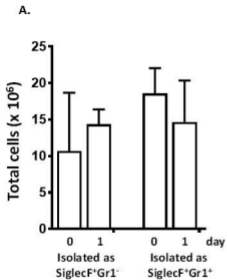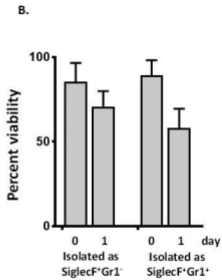

Suppl. Fig. 3

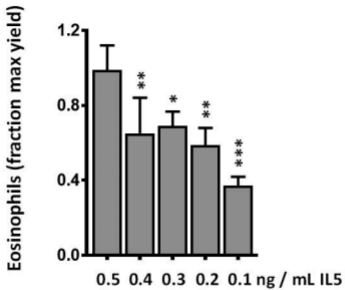

Suppl. Fig. 4

A.

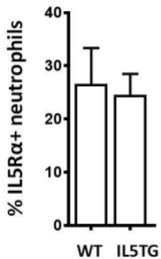

B.

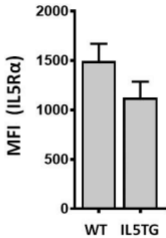

Supplement: NIHMS1055160-supplement-Supp_FigS1-5.pdf [file NIHMS1055160-supplement-Supp_FigS1-5.pdf]
